# Supplementary material for: The mechanism of electropolymerization of nickel(ii) salen type complexes
Source: Royal Society of Chemistry journal article supplement (doi:10.1039/c6nj03635j), 2017-01-01
Supplement: c6nj03635j1.pdf [file c6nj03635j1.pdf]

## Mechanism of electropolymerization of nickel(II) salen type complexes

Danuta Tomczyk\*<sup>a</sup>, Wiktor Bukowski<sup>b</sup>, Karol Bester<sup>b</sup>, Paweł Urbaniak<sup>a</sup>, Piotr Seliger<sup>a</sup>, Grzegorz Andrijewski<sup>a</sup> and Sławomira Skrzypek<sup>a</sup>

Supplementary materials:

Tab. S1. Comparison of FTIR ATR bands of *poly*[Ni(salcn)] films (electrosynthesized in Bu<sub>4</sub>NPF<sub>6</sub> or Bu<sub>4</sub>NClO<sub>4</sub>) with FTIR bands of [Ni(salcn)] complex.

| <i>complex</i> | <i>film</i>                           | <i>attributed to</i>                                                                                                | <i>comments</i>                                                                                                                                                   |
|----------------|---------------------------------------|---------------------------------------------------------------------------------------------------------------------|-------------------------------------------------------------------------------------------------------------------------------------------------------------------|
| 1904(w)        | -                                     | overtones <sup>46</sup>                                                                                             |                                                                                                                                                                   |
| 1871(w)        | -                                     | overtones                                                                                                           |                                                                                                                                                                   |
| 1832(w)        | -                                     | overtones                                                                                                           |                                                                                                                                                                   |
|                | 1750(vw)                              | overtones                                                                                                           |                                                                                                                                                                   |
| 1624(s)        | (s)                                   | C=N <sup>44</sup>                                                                                                   |                                                                                                                                                                   |
| 1601(s)        | (m, sh)                               | CC aromatic ring <sup>36</sup>                                                                                      |                                                                                                                                                                   |
| -              | 1562(m)                               | CC aromatic ring                                                                                                    |                                                                                                                                                                   |
| 1541(s)        | (m, sh)                               | CC aromatic ring                                                                                                    |                                                                                                                                                                   |
| 1475(s)        | (m, sh)                               | CC aromatic ring                                                                                                    |                                                                                                                                                                   |
| 1454(s)        | (m)                                   | CH <sub>2</sub> symmetric bending <sup>42</sup>                                                                     |                                                                                                                                                                   |
| 1390(m)        | (m)                                   | C-N <sup>43</sup>                                                                                                   |                                                                                                                                                                   |
| 1348(s)        | (m)                                   | C-H bending vibrations in cyclohexane moiety <sup>42</sup>                                                          |                                                                                                                                                                   |
| 1335(s)        |                                       | C-H bending vibrations in cyclohexane moiety <sup>42</sup>                                                          | in films – overload with 1319                                                                                                                                     |
| 1319(s)        | (m)                                   | C-O stretching <sup>43</sup>                                                                                        |                                                                                                                                                                   |
| 1297(w)        | (m)                                   | Ar C-H in plane bends <sup>36,37</sup>                                                                              | in film with PF <sub>6</sub> <sup>-</sup> (m);<br>in film with ClO <sub>4</sub> <sup>-</sup> (w);<br>moved to ~1292                                               |
| -              | 1276(m, sh)                           | Ar C-H in plane bends and CH <sub>2</sub> out of plane bendings in CH <sub>2</sub> Cl <sub>2</sub> <sup>36-39</sup> | in film with PF <sub>6</sub> <sup>-</sup> (m, sh);<br>in film with ClO <sub>4</sub> <sup>-</sup> (w, sh)                                                          |
| -              | 1247(m)                               | Ar C-H in plane bends <sup>36,39</sup>                                                                              |                                                                                                                                                                   |
| 1227(w)        |                                       | Ar C-H in plane bends                                                                                               | in film with PF <sub>6</sub> <sup>-</sup> - overload with 1218;<br>in film with ClO <sub>4</sub> <sup>-</sup> - covered                                           |
| -              | 1220-1000(s, br),<br>max. 1092(s)     | Cl-O <sup>35</sup>                                                                                                  | absent in film with PF <sub>6</sub> <sup>-</sup>                                                                                                                  |
| -              | 1220-1000(s, br),<br>max. 1079(s, sh) | Cl-O                                                                                                                | absent in film with PF <sub>6</sub> <sup>-</sup>                                                                                                                  |
| 1218(m)        | (m, sh)                               | Ar C-H in plane bends <sup>35,37</sup>                                                                              | in film with ClO <sub>4</sub> <sup>-</sup> - covered by ClO <sub>4</sub> <sup>-</sup><br>(1220-1000)                                                              |
| 1192(m)        | (w)                                   | Ar C-H in plane bends                                                                                               | in film with PF <sub>6</sub> <sup>-</sup> - moved to 1190<br>in film with ClO <sub>4</sub> <sup>-</sup> - covered by ClO <sub>4</sub> <sup>-</sup><br>(1220-1000) |
| -              | 1177(m, sh)                           | Ar C-H in plane bends                                                                                               | on band ClO <sub>4</sub> <sup>-</sup> (m)                                                                                                                         |
| 1142(s)        | (m)                                   | Ar C-H in plane bends                                                                                               | on band ClO <sub>4</sub> <sup>-</sup> (m)                                                                                                                         |
| 1121(m)        | (w, sh)                               | Ar C-H in plane bends                                                                                               | in film with PF <sub>6</sub> <sup>-</sup> - moved to 1125                                                                                                         |

|         |                                 |                                                                                  |                                                                                                                                                                |
|---------|---------------------------------|----------------------------------------------------------------------------------|----------------------------------------------------------------------------------------------------------------------------------------------------------------|
|         |                                 |                                                                                  | in film with ClO <sub>4</sub> <sup>-</sup> - on band ClO <sub>4</sub> <sup>-</sup> (m)                                                                         |
| 1109(w) | (w, sh)                         | Ar C-H in plane bends                                                            | in film with PF <sub>6</sub> <sup>-</sup> - moved to 1104<br>in film with ClO <sub>4</sub> <sup>-</sup> - covered by ClO <sub>4</sub> <sup>-</sup> (1220-1000) |
| 1043(m) | (w)                             | cyclohexane ring stretching and Ar C-H in plane bends <sup>36,37,42</sup>        | covered by ClO <sub>4</sub> <sup>-</sup> (1220-1000)                                                                                                           |
| 1009(m) | (w)                             | cyclohexane ring stretching and Ar C-H in plane bends                            | in film with PF <sub>6</sub> <sup>-</sup> - moved to 1014<br>in film with ClO <sub>4</sub> <sup>-</sup> - covered by ClO <sub>4</sub> <sup>-</sup> (1220-1000) |
| -       | 1000(w, sh)                     | Cl-O <sup>35</sup>                                                               | absent in film with PF <sub>6</sub> <sup>-</sup>                                                                                                               |
| -       | 978(w)                          | Ar C-H in plane bends <sup>36,37</sup>                                           |                                                                                                                                                                |
| 947(m)  | (w, sh)                         | Ar C-H in plane bends                                                            | in films - moved to 943                                                                                                                                        |
| 912(w)  | -                               |                                                                                  | in films - overload with 908                                                                                                                                   |
| 908(s)  | (w)                             | cyclohexane, ring stretching <sup>42</sup>                                       | in film with PF <sub>6</sub> <sup>-</sup> - (w);<br>in film with ClO <sub>4</sub> <sup>-</sup> - (m)                                                           |
| -       | 892(m)                          | Ar C-H out of plane bending and CH <sub>2</sub> Cl <sub>2</sub> <sup>36-39</sup> | covered by PF <sub>6</sub> <sup>-</sup> (900-800);                                                                                                             |
| -       | 874(w, sh)                      | Ar C-H out of plane bending <sup>36,37</sup>                                     | covered by PF <sub>6</sub> <sup>-</sup> (900-800);                                                                                                             |
| -       | 900-800 (s, br),<br>max. 844(s) | P-F <sup>34</sup>                                                                | absent in film with ClO <sub>4</sub> <sup>-</sup>                                                                                                              |
| 846(s)  | (w)                             | cyclohexane, ring stretching <sup>42</sup>                                       | in film with ClO <sub>4</sub> <sup>-</sup> - moved to 852<br>in film with PF <sub>6</sub> <sup>-</sup> - covered by PF <sub>6</sub> <sup>-</sup> (900-800)     |
| -       | 818(w)                          | Ar C-H out of plane bending <sup>36,37</sup>                                     | covered by PF <sub>6</sub> <sup>-</sup> (900-800)                                                                                                              |
| -       | 804(w)                          | Ar C-H out of plane bending                                                      | covered by PF <sub>6</sub> <sup>-</sup> (900-800);                                                                                                             |
| 798(w)  | (w, sh)                         |                                                                                  |                                                                                                                                                                |
| -       | 780-600(m, br),<br>max. 702(m)  | Cl-O <sup>35</sup>                                                               | absent in film with PF <sub>6</sub> <sup>-</sup>                                                                                                               |
| 750(s)  | (w)                             | Ar C-H out of plane bending and C-Cl stretching <sup>36-39</sup>                 | on band ClO <sub>4</sub> <sup>-</sup> (780 -600)                                                                                                               |
| 738(s)  | (w)                             | Ar C-H out of plane bending <sup>36-39</sup>                                     | on band ClO <sub>4</sub> <sup>-</sup> (780 -600)                                                                                                               |
| -       | 703(w, sh)                      | Ar C-H out of plane bending and C-Cl stretching                                  | covered by ClO <sub>4</sub> <sup>-</sup> (780 -600)                                                                                                            |
| 689(w)  | (w, sh)                         | Ar CC out of plane bending                                                       | in film with PF <sub>6</sub> <sup>-</sup> - moved to 682<br>in film with ClO <sub>4</sub> <sup>-</sup> - on band ClO <sub>4</sub> <sup>-</sup> (780 -600)      |
| 681(w)  | (w, sh)                         | Ar CC out of plane bending                                                       | in film with PF <sub>6</sub> <sup>-</sup> - moved to 677<br>in film with ClO <sub>4</sub> <sup>-</sup> - on band ClO <sub>4</sub> <sup>-</sup> (780 -600)      |
| 618(w)  | (w)                             | Ni-N                                                                             | absent on ligand spectrum                                                                                                                                      |
| 581(s)  | (m)                             | Ni-O                                                                             | absent on ligand spectrum                                                                                                                                      |
| -       | 568(m)                          | P-F <sup>34</sup>                                                                | absent in film with ClO <sub>4</sub> <sup>-</sup>                                                                                                              |
| 547(w)  | (w)                             |                                                                                  | in film with PF <sub>6</sub> <sup>-</sup> - (w);<br>in film with ClO <sub>4</sub> <sup>-</sup> - (m)                                                           |

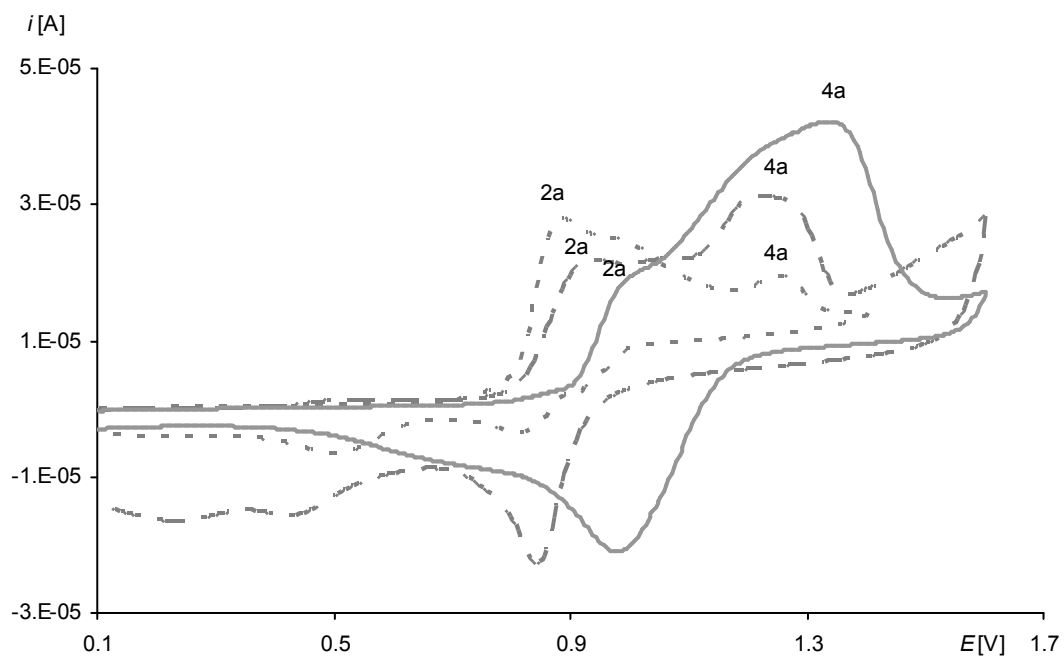

Fig.S1 Cyclic voltammograms of complexes in TBAH/CH<sub>2</sub>Cl<sub>2</sub>, 0.1÷1.6 V,  $\nu = 0.05 \text{ V}\cdot\text{s}^{-1}$ , 1<sup>st</sup> scans vs. Ag/AgCl; T=293K; solid line – [Ni(salcn)], dashed line – [Ni(salcn(Me))], dotted line - [Ni(salcn(Bu))].

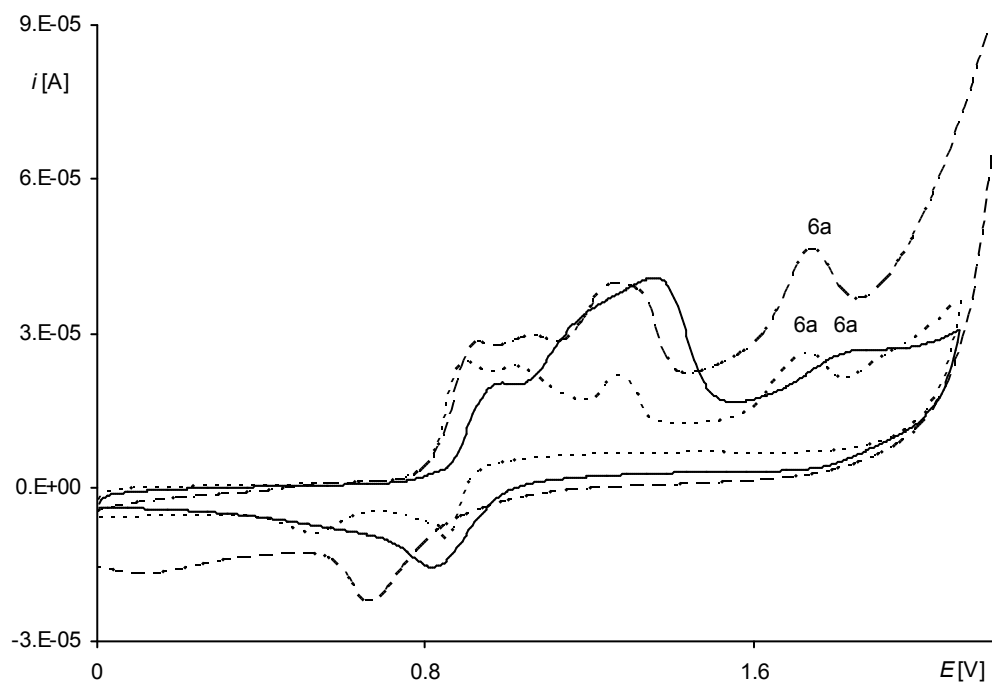

Fig.S2 Cyclic voltammograms of complexes in TBAH/CH<sub>2</sub>Cl<sub>2</sub>, 0.1÷2.1 V,  $\nu = 0.05 \text{ V}\cdot\text{s}^{-1}$ , 1<sup>st</sup> scans vs. Ag/AgCl; T=293K; solid line – [Ni(salcn)], dashed line – [Ni(salcn(Me))], dotted line - [Ni(salcn(Bu))].
